# Supplementary material for: An electrochemical sensor based on DNA polymerase and HRP-SiO2 nanoparticles for the ultrasensitive detection of K-ras gene point mutation
Source: Royal Society of Chemistry journal article supplement (doi:10.1039/c5ra24737c), 2016-01-01
Supplement: c5ra24737c1.pdf [file c5ra24737c1.pdf]

## Supporting Information

An electrochemical sensor based on DNA polymerase  
and HRP-SiO<sub>2</sub> nanoparticles for the ultrasensitive  
detection of K-ras gene point mutation

Chengfei Zhao<sup>a</sup>, Feng Gao<sup>d</sup>, Shaohuang Weng<sup>b</sup>, Qicai Liu<sup>\*,c</sup>, Liqing Lin<sup>\*</sup>,

<sup>b</sup> and Xinhua Lin<sup>b□</sup>

---

<sup>a</sup> Pharmaceutical and Medical Technology College, Putian University, Putian 351100, China.

<sup>b</sup> Department of Pharmaceutical Analysis, Faculty of Pharmacy, Fujian Medical University, Fuzhou 350108, China.

<sup>c</sup> Department of Clinical Laboratory, The First Affiliated Hospital of Fujian Medical University, Fuzhou 350005, China

<sup>d</sup> Department of Pathology, The First Affiliated Hospital of Fujian Medical University, Fuzhou 350005, China

\* Corresponding author: Liqing Lin: [fjmu\\_lin@126.com](mailto:fjmu_lin@126.com); Qicai Liu: [lqc673673673@163.com](mailto:lqc673673673@163.com).

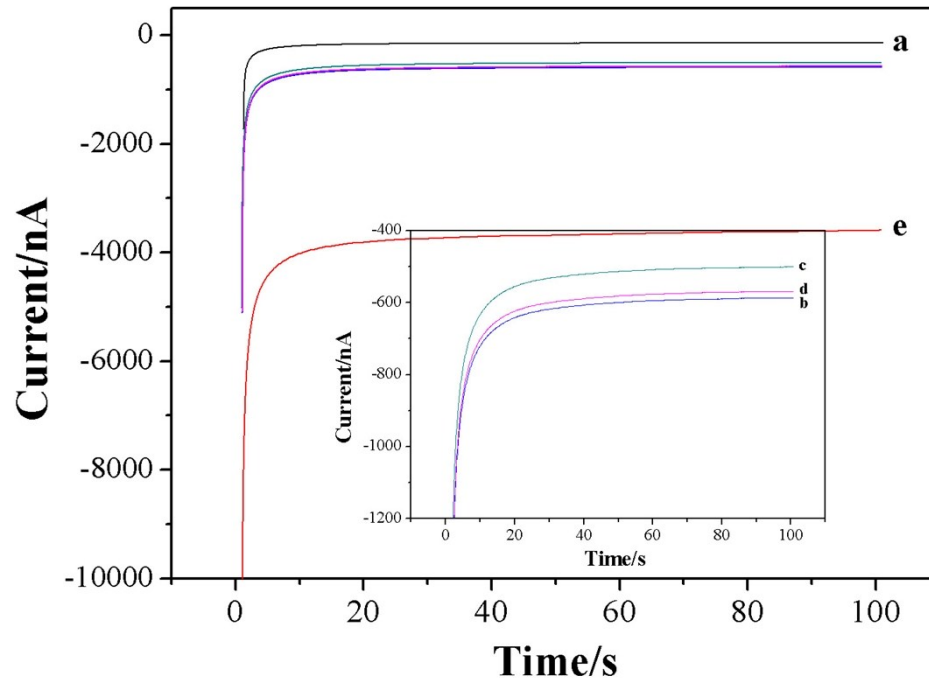

Fig. S1 i-t curve in TMB solution, PBS (a), wild K-ras DNA (b), non-target DNA 1 (c), non-target DNA 2 (d) and target DNA (e) as hybridization solution, respectively.

Table S1 Comparison between the proposed sensor and the previously reported sensors for the detection of K-ras gene point mutant

| Methods                                                                                      | Detection method        | Electrode treatment                                                                                 | Linear range (pM) | Limit of detection (fM) | Reference |
|----------------------------------------------------------------------------------------------|-------------------------|-----------------------------------------------------------------------------------------------------|-------------------|-------------------------|-----------|
| Hairpin LNA biosensor with enzyme tagged AuNPs                                               | Amperometric curve      | Poly-Eriochrome cyanine R film modified glassy carbon electrode                                     | 0.001-10          | 1.0                     | 17        |
| Chronocoulometric LNA sensor based on site-specific DNA cleavage of restriction endonuclease | Chronocoulometric curve | Gold nanoparticles modified gold electrode                                                          | 0.001-10          | 0.5                     | 18        |
| Nanogap sensor array                                                                         | Conductance             | Electronic sensor array                                                                             | 0.0003-1          | 0.1                     | 19        |
| Ligase chain reaction amplification                                                          | Electrochemiluminescent | PDDA <sup>a</sup> @MWCNTs <sup>b</sup> /QDs <sup>c</sup> /chitosan modified glassy carbon electrode | 0.05-50           | 45                      | 20        |
| Chronocoulometric biosensor based on E. coli DNA ligase and AuNPs                            | Chronocoulometric curve | Bare gold electrode                                                                                 | 0.1-1000          | 10                      | 21        |
| Electrochemical DNA sensor based on DNA polymerase I and HRP-SiO <sub>2</sub> nanoparticles  | Amperometric curve      | Bare gold electrode                                                                                 | 0.001-100         | 0.42                    | This work |

<sup>a</sup> Poly(diallyldimethyl ammonium chloride), <sup>b</sup> Carboxylated multi-wall carbon nanotubes, <sup>c</sup> Quantum dots.
